# Supplementary material for: A new colorimetric receptor for selective detection of maleate vs. fumarate and ratiometric detection of F− ions
Source: Royal Society of Chemistry journal article supplement (doi:10.1039/c4ay00296b), 2014-01-01
Supplement: c4ay00296b1.pdf [file c4ay00296b1.pdf]

# **A New Colorimetric Receptor for Selective Detection of Maleate vs. Fumarate and Ratiometric Detection of F<sup>-</sup> Ions**

**Madhuprasad and Darshak R. Trivedi\***

*Supramolecular Chemistry Laboratory, Department of Chemistry, National Institute of  
Technology Karnataka (NITK), Surathkal, 575025, Karnataka, India*

*Tel: +91-824-2474000 Extn No. 3205*

*Email: darshak\_rtrivedi@yahoo.co.in*

## Contents

|    |                                 |    |
|----|---------------------------------|----|
| 1  | <sup>1</sup> H NMR of R1        | S3 |
| 2  | <sup>1</sup> H NMR of R2        | S3 |
| 3  | <sup>1</sup> H NMR of R3        | S4 |
| 4  | Photographs                     | S4 |
| 5  | UV-Vis titrations of R1 in DMSO | S6 |
| 6  | Job's Plot for R1               | S6 |
| 7  | UV-Vis titrations of R1 in DMSO | S7 |
| 8  | Job's Plot for R2               | S7 |
| 9  | UV-spectral Changes of R1-R3    | S8 |
| 10 | Binding constant calculation    | S9 |

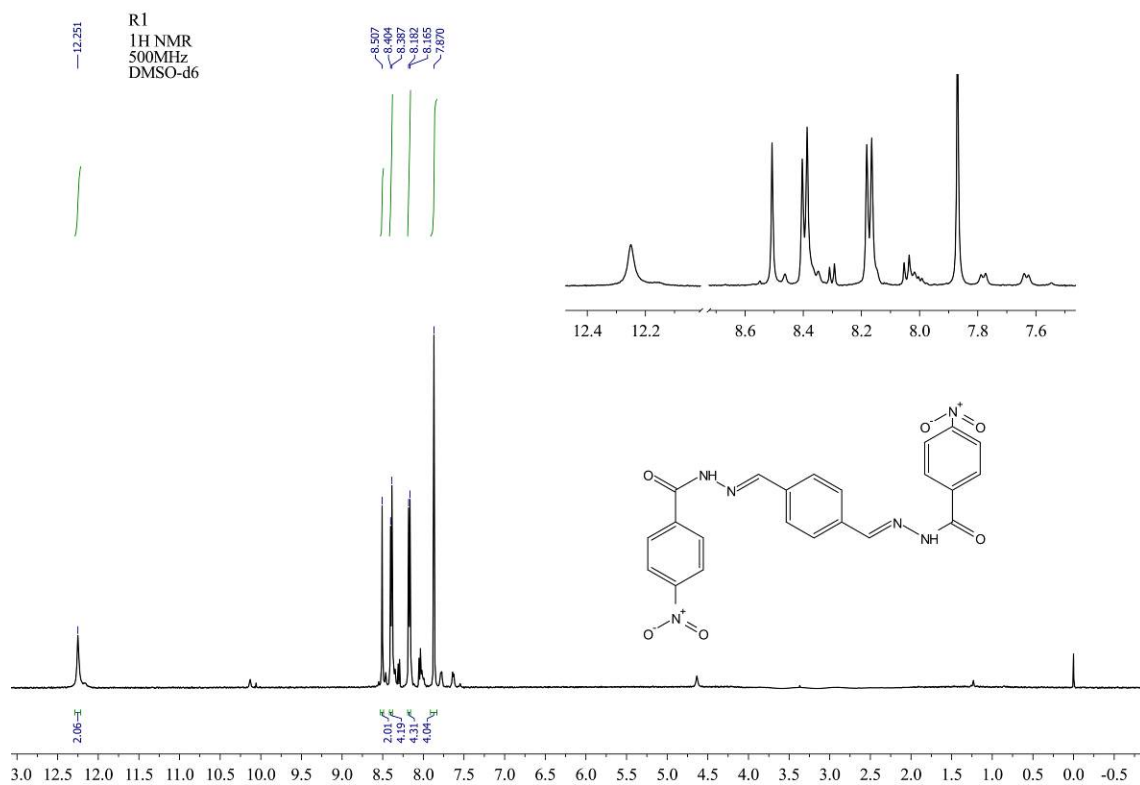

Figure S1. <sup>1</sup>H NMR spectra of R1.

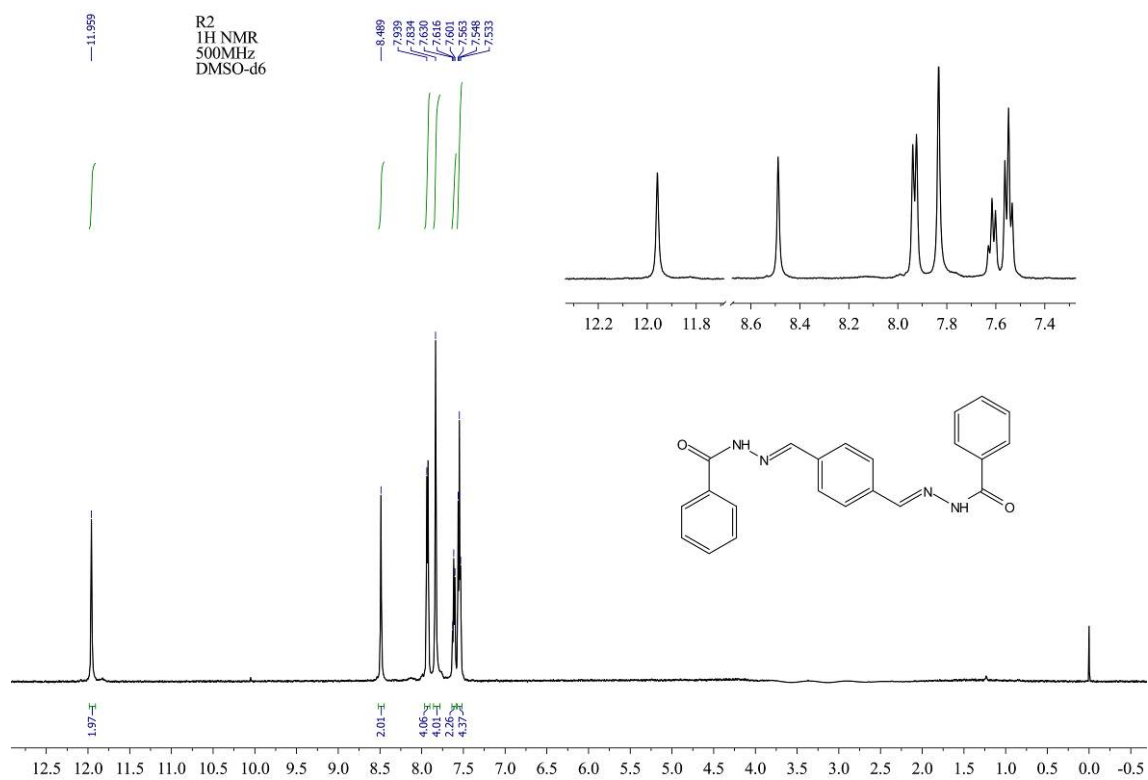

Figure S2. <sup>1</sup>H NMR spectra of R2.

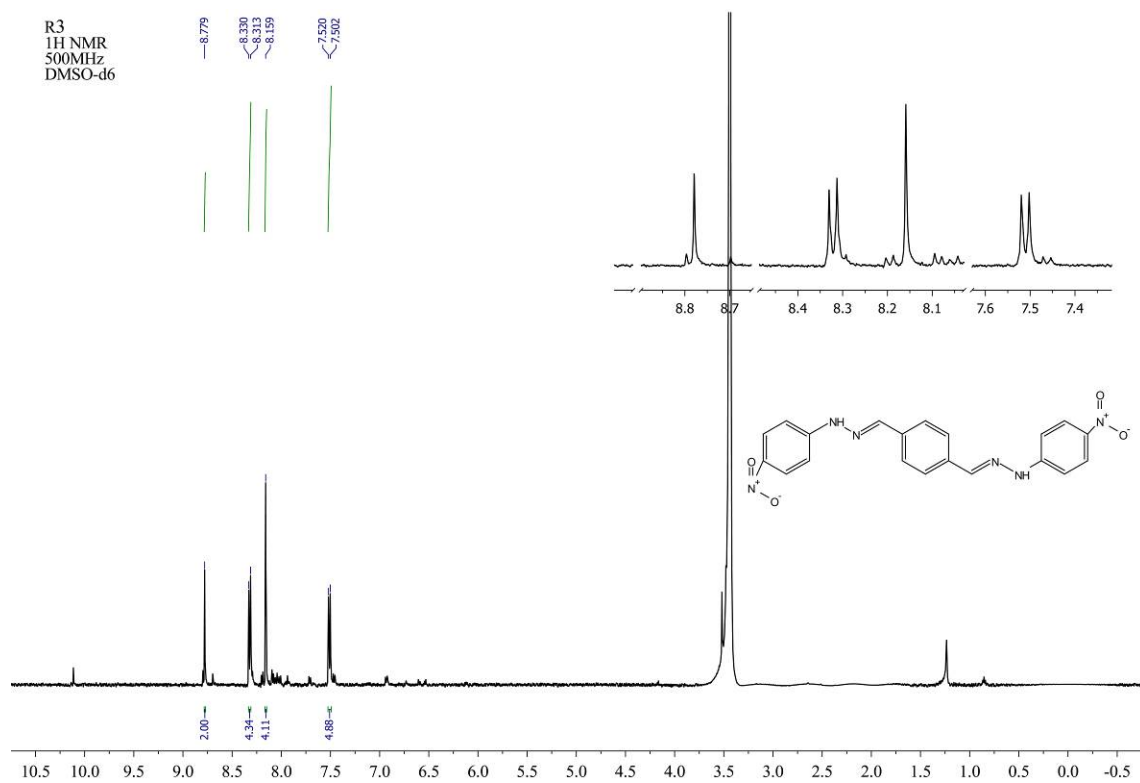

**Figure S3.** <sup>1</sup>H NMR spectra of R3.

**Photographs:**

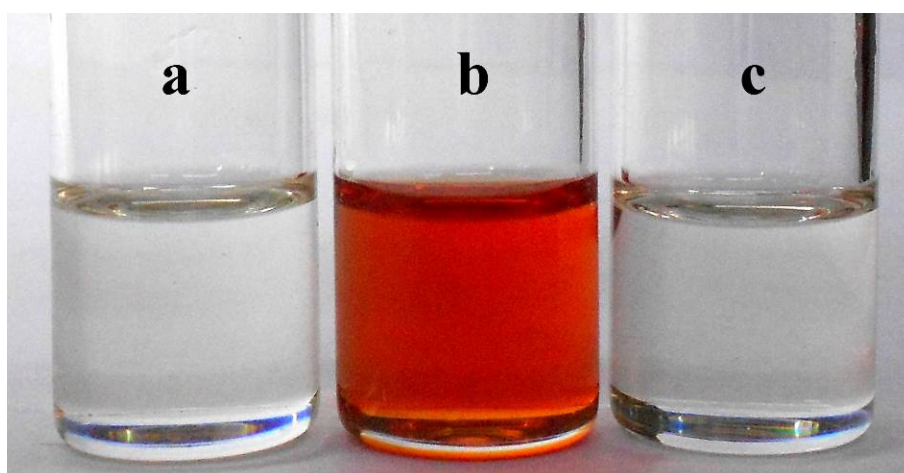

**Figure S4.** Change in color on addition 1 equiv. of anions in the form of TBA salt. (a) Free receptor R1 ( $5 \times 10^{-5}$  M), (b) R1+ 1 equiv. maleate ions and (c) R1+ 1 equiv. fumarate ions.

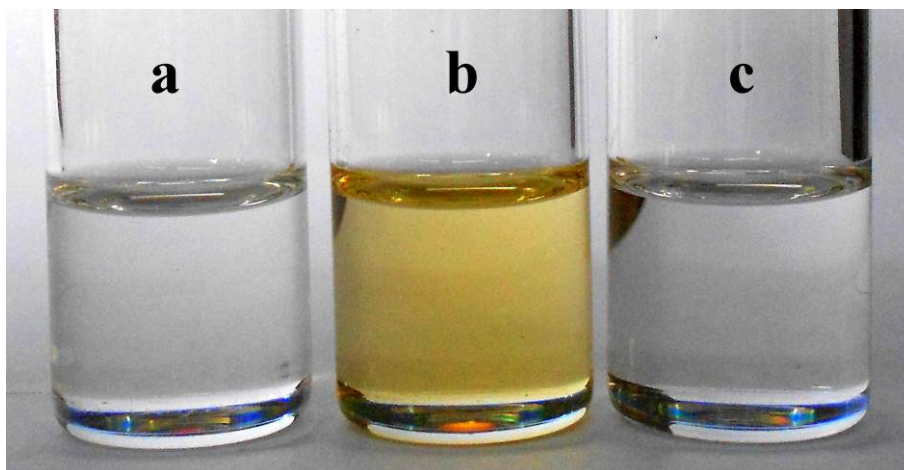

**Figure S5.** Change in color on addition 1 equiv. of anions in the form of TBA salt. (a) Free receptor R2 ( $5 \times 10^{-5}$  M), (b) R2+ 1 equiv. maleate ions and (c) R2+ 1 equiv. fumarate ions

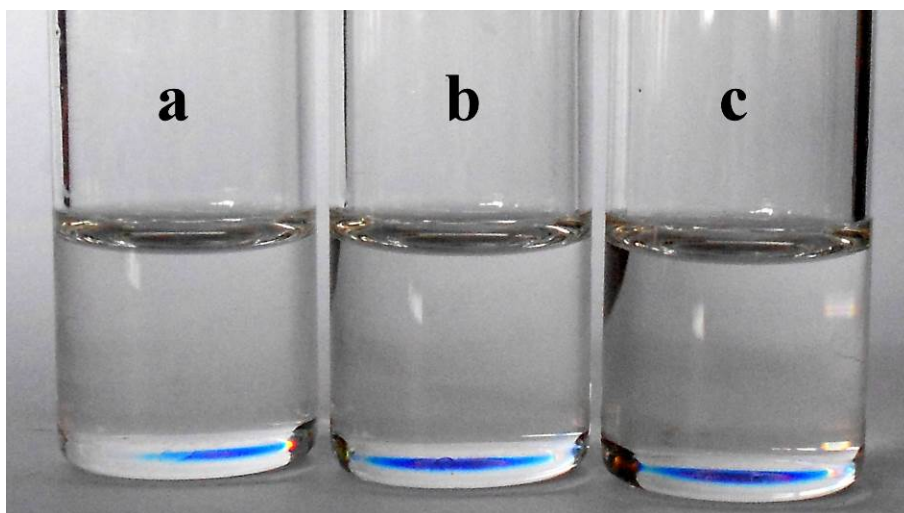

**Figure S6.** Change in color on addition 1 equiv. of anions in the form of TBA salt. (a) Free receptor R3 ( $5 \times 10^{-5}$  M), (b) R3+ 1 equiv. maleate ions and (c) R3+ 1 equiv. fumarate ions.

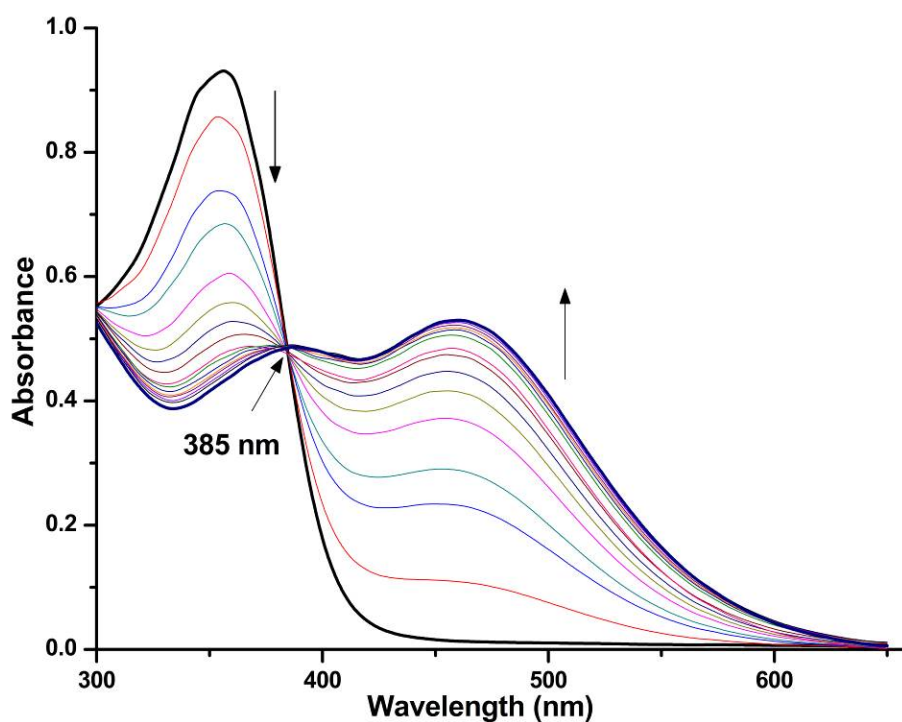

**Figure S7:** UV-Vis titration of receptor R1 ( $5 \times 10^{-5}$  M) in DMSO with standard solution of maleate ions (0 – 15 equiv.).

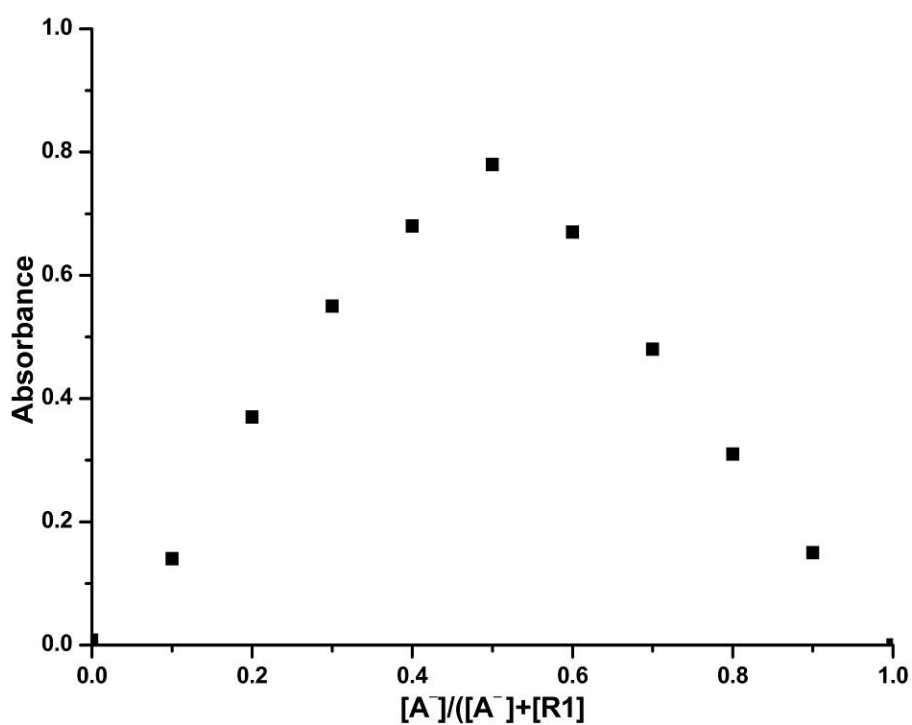

**Figure S8:** Jobs plot at 460 nm which indicates 1:1 complexation ratio between R1 and maleate ion.

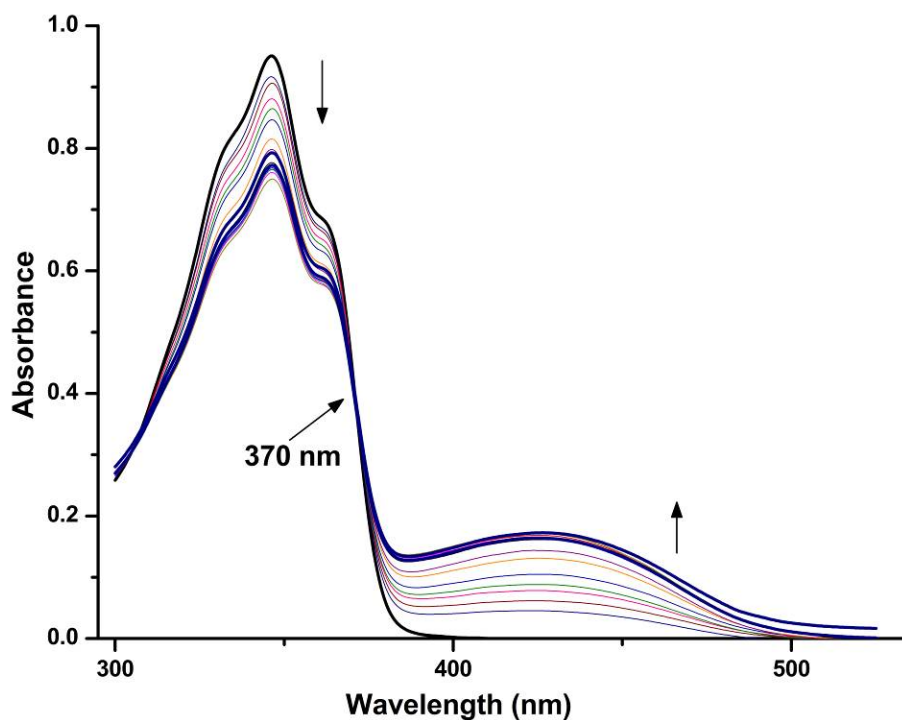

**Figure S9:** UV-Vis titration of receptor R2 ( $5 \times 10^{-5}$  M) in DMSO with standard solution of maleate ions (0 – 15 equiv.).

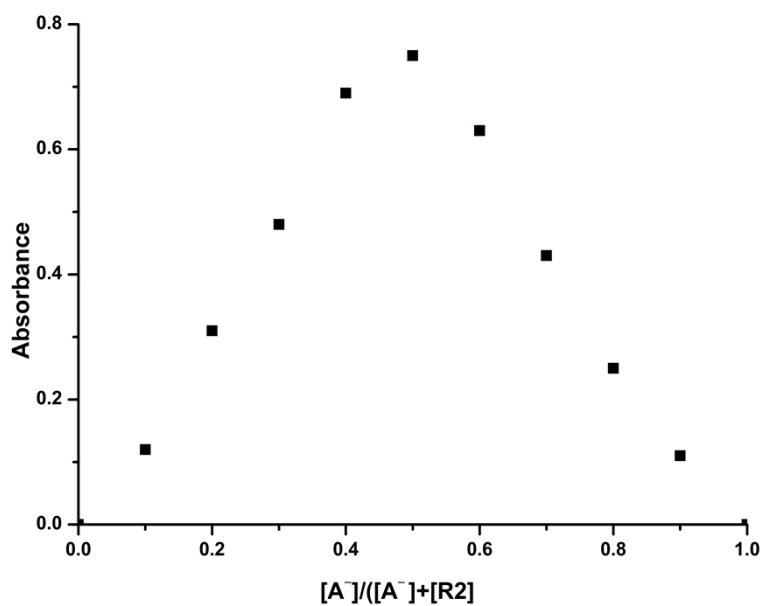

**Figure S10:** Jobs plot at 427 nm which indicates 1:1 complexation ratio between R2 and maleate ion.

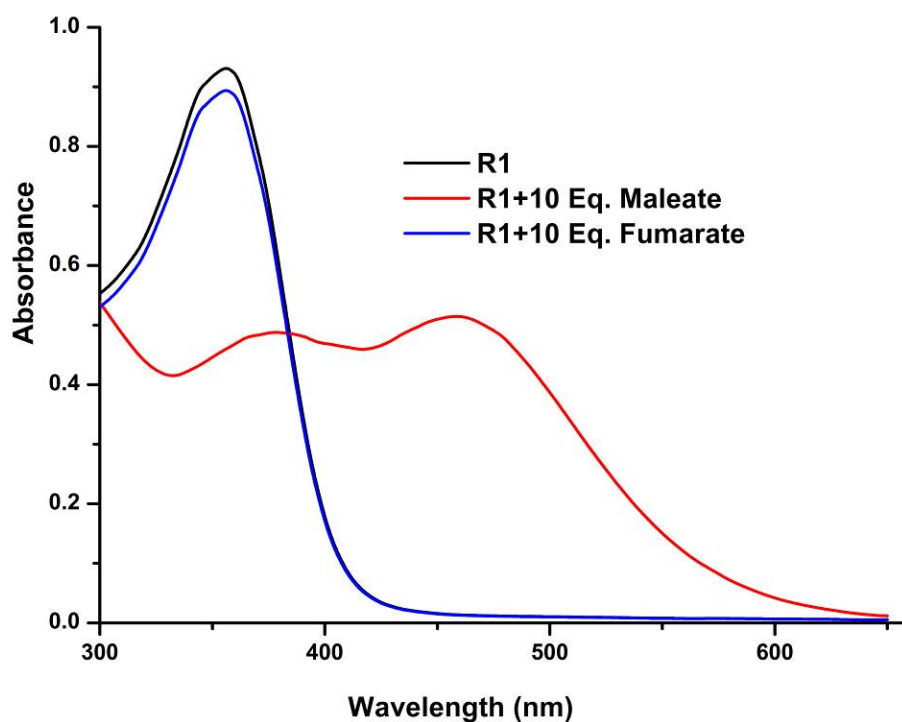

**Figure S11:** UV–Vis spectral changes of R1 ( $5 \times 10^{-5}$ M) in DMSO after addition of 10 equiv. of maleate and fumarate in the form of TBA salts.

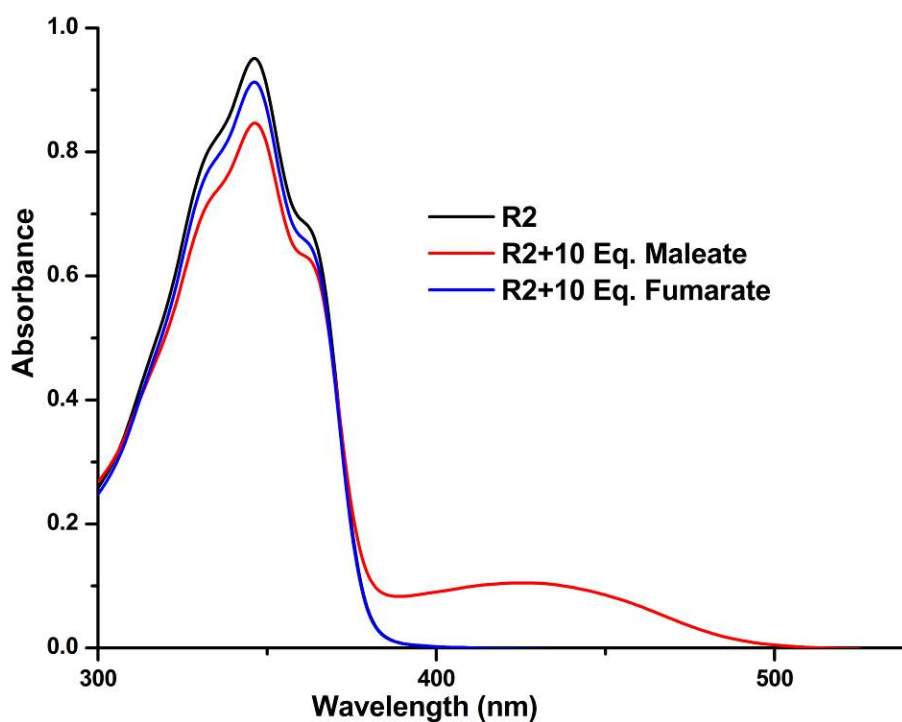

**Figure S12:** UV–Vis spectral changes of R2 ( $5 \times 10^{-5}$ M) in DMSO after addition of 10 equiv. of maleate and fumarate in the form of TBA salts.



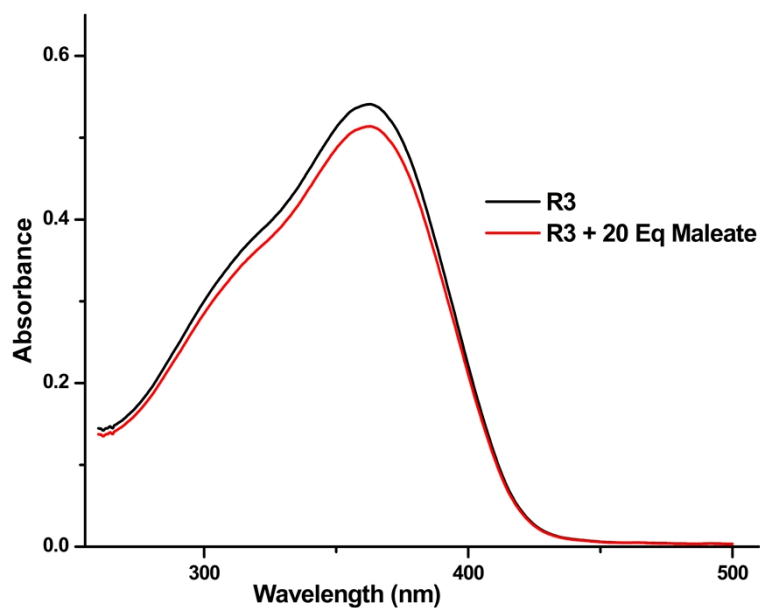

**Figure S13:** UV–Vis spectral changes of R3 ( $5 \times 10^{-5}\text{M}$ ) in DMSO after addition of 20 equiv. of maleate ions in the form of TBA salts.

**Binding constant:**

Binding constant was calculated using equation (1).

$$\frac{1}{(A - A_0)} = \frac{1}{(A_{max} - A_0)} + \frac{1}{K[F^-]^n(A_{max} - A_0)} \dots\dots\dots(1)$$

Where,  $A_0$ ,  $A$ ,  $A_{max}$  are the absorption considered in the absence of  $F^-$ , at an intermediate, and at a concentration of saturation.  $K$  is binding constant,  $[F^-]$  is concentration of  $F^-$  ion and  $n$  is the stoichiometric ratio.
